# Supplementary material
Source: PubMed Central journal article supplement (PMC7138078)
Supplement: TBED-67-884-s001.pdf [file TBED-67-884-s001.pdf]

**Supplementary Table S1.** IBV strains included in this phylogenetic analysis.

| <b>Strain</b>    | <b>Accession no.</b>                           | <b>Country</b> | <b>Strain</b>  | <b>Accession no.</b>          | <b>Country</b> |
|------------------|------------------------------------------------|----------------|----------------|-------------------------------|----------------|
| Vic              | DQ490221                                       | Australia      | 2296/95        | DQ646404                      | Taiwan         |
| Armidale         | DQ490205                                       | Australia      | 2575/98        | DQ646405                      | Taiwan         |
| Sczy3            | JF732903                                       | China          | 2992/02        | EU822340                      | Taiwan         |
| YN               | JF893452                                       | China          | 3071/03        | EU822340                      | Taiwan         |
| LX4              | AY338732                                       | China          | 3263/04        | EU822338                      | Taiwan         |
| BJ               | AY319651                                       | China          | 3374/05        | EU822338                      | Taiwan         |
| YX10             | JX840411                                       | China          | 3382/06        | GQ229232                      | Taiwan         |
| DY07             | HM245923                                       | China          | 3468/07        | EU822338                      | Taiwan         |
| Sczy3            | JF732903                                       | China          | TC3/13         | MF673729                      | Taiwan         |
| SAIBK            | DQ288927                                       | China          | S78/14         | KX668222                      | Taiwan         |
| CK/CH/LDL/97I    | JX195177                                       | China          | H120           | EU822341                      | Netherlands    |
| CK/CH/LDL/98I    | EF602446                                       | China          | Gray           | GU393334                      | USA            |
| Q1               | AF286302                                       | China          | Holte          | GU393336                      | USA            |
| J2               | AF286303                                       | China          | M41            | DQ834384                      | USA            |
| T3               | AF227438                                       | China          | Beaudette      | AJ311317                      | USA            |
| QXIBV            | AF193423 (S1)<br>AF288146 (S2)<br>AF199412 (N) | China          | CU-T2          | U49858                        | USA            |
| CK/CH/2010/JT-1  | KU361187                                       | China          | JP/Toyama/2000 | MF462335                      | Japan          |
| CK/CH/LGX/111119 | KX640829                                       | China          | JP/Akita/92    | MF462334                      | Japan          |
| CK/CH/LDL/140520 | KP790143                                       | China          | JP9758         | AY296746 (S1)<br>AY363968 (N) | Japan          |
| CK/CH/LHB/100801 | JF330898                                       | China          | JP8127         | AY296744                      | Japan          |
| SC021202         | AY237817                                       | China          | JP8147         | AY363966                      | Japan          |
| 4/91             | AF093793                                       | United Kingdom | -              | -                             | -              |

**Supplementary Table S2.** Neutralization test of IBVs. Homologous titers are indicated in bold.

|       | IBV strain        | Virus             |                    |                |                   |                    |                      |
|-------|-------------------|-------------------|--------------------|----------------|-------------------|--------------------|----------------------|
|       |                   | 2575/98<br>(TW-I) | 2296/95<br>(TW-II) | H120<br>(Mass) | S78/14<br>(TW-JP) | 2992/02<br>(TW-CN) | 3382/06<br>(TW-Mass) |
| Serum | 2575/98 (TW-I)    | <b>1475</b>       | 108                | 16             | 4                 | 37                 | 861                  |
|       | 2296/95 (TW-II)   | 101               | <b>512</b>         | 203            | 22                | 91                 | 102                  |
|       | H120 (Mass)       | 32                | 22                 | <b>531</b>     | 6                 | 102                | 45                   |
|       | S78/14 (TW-JP)    | 45                | <4                 | 31             | <b>1626</b>       | 27                 | 39                   |
|       | 2992/02 (TW-CN)   | <4                | 7                  | 9              | <4                | <b>670</b>         | 28                   |
|       | 3382/06 (TW-Mass) | 2435              | 10                 | 16             | <4                | 30                 | <b>3025</b>          |

**Supplementary Table S3.** Summary of IBV recombinant variants

| Variant | Genotype       | Serotype  | Pathotype  | Viral tropism |                |        |         |
|---------|----------------|-----------|------------|---------------|----------------|--------|---------|
|         |                |           |            | Trachea       | Proventriculus | Kidney | Oviduct |
| S78/14  | TW-JP (GI-18)  | Novel     | Lethal     | Yes           | Yes            | Yes    | Yes     |
| 2992/02 | TW-CN (GI-16)  | Novel     | Lethal     | Yes           | Yes            | Yes    | Yes     |
| 3382/06 | TW-Mass (GI-7) | TW-I-like | Non-lethal | Yes           | Yes            | Yes    | No      |
